# Supplementary material for: Phylogenetic diversity of stress signalling pathways in fungi
Source: PubMed Central journal article supplement (PMC2666651; doi:10.1186/1471-2148-9-44), 2009-02-21

# A Osmotic stress pathway

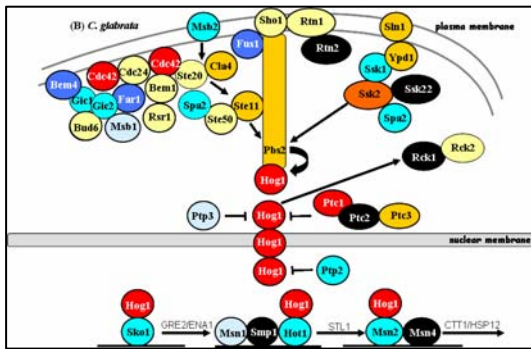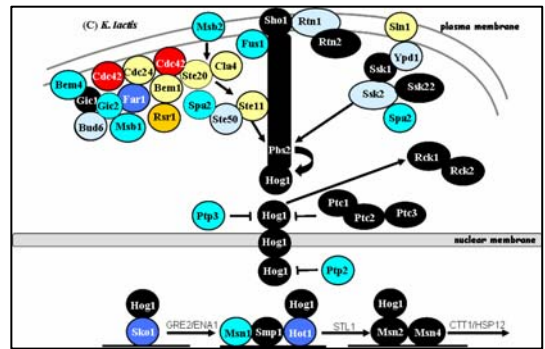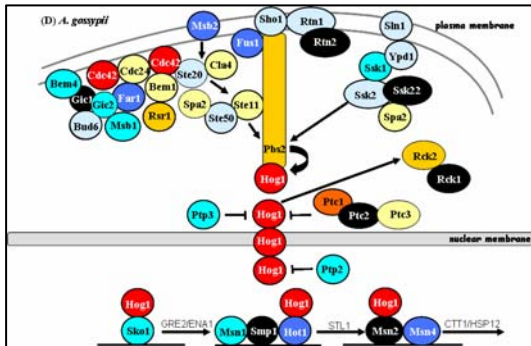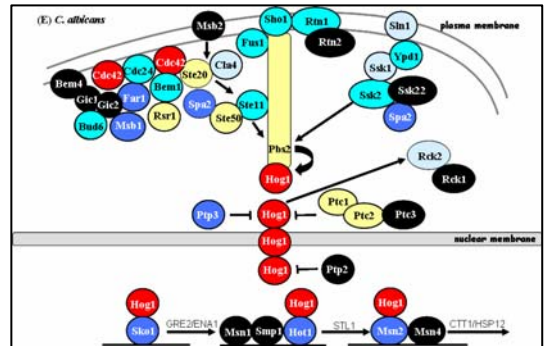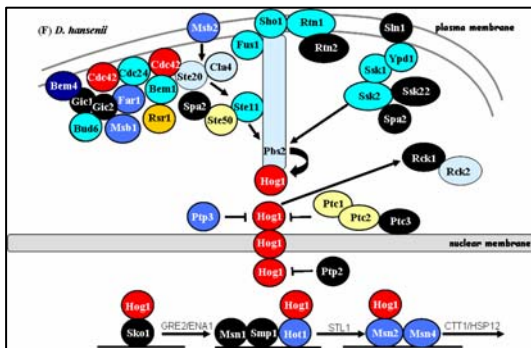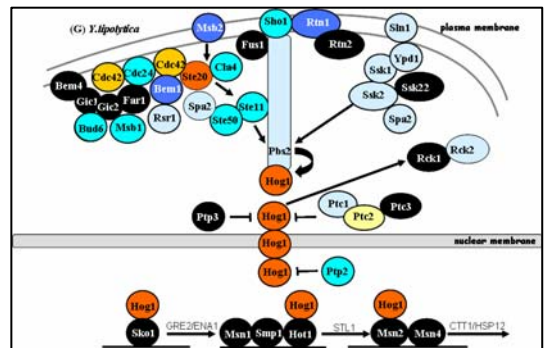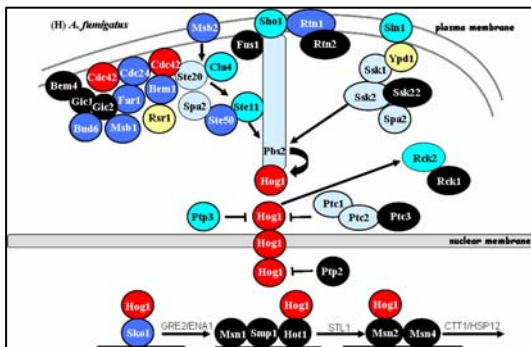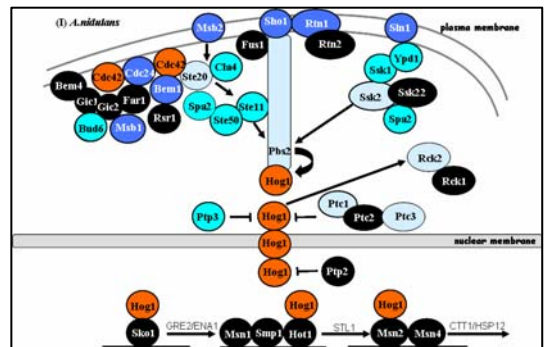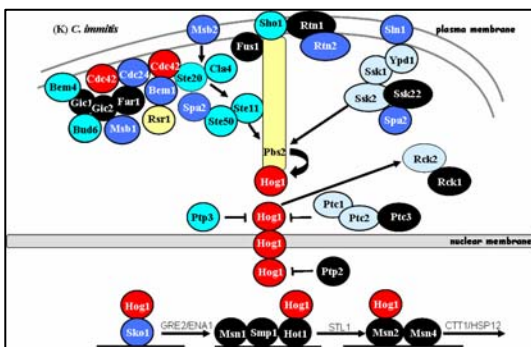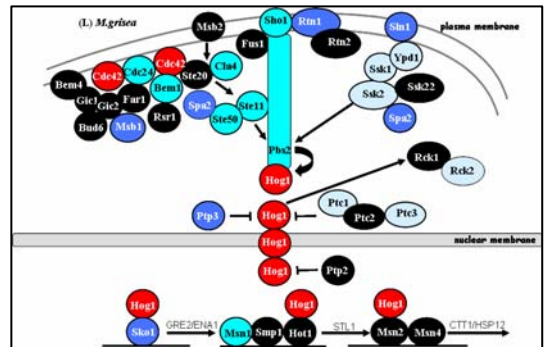

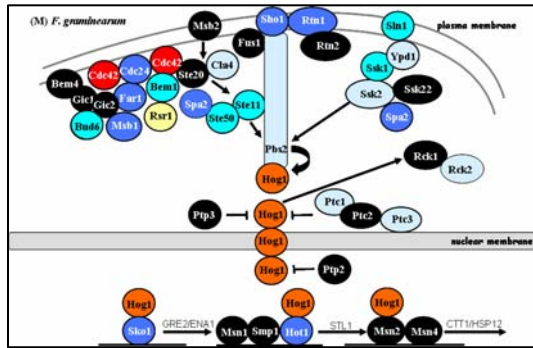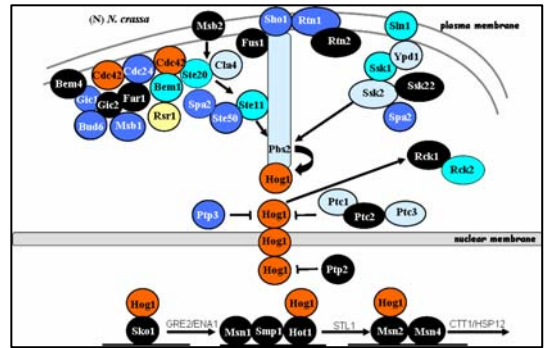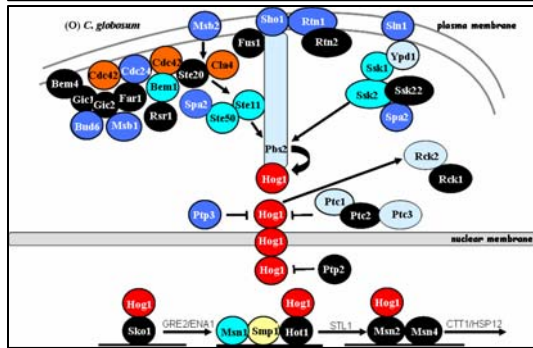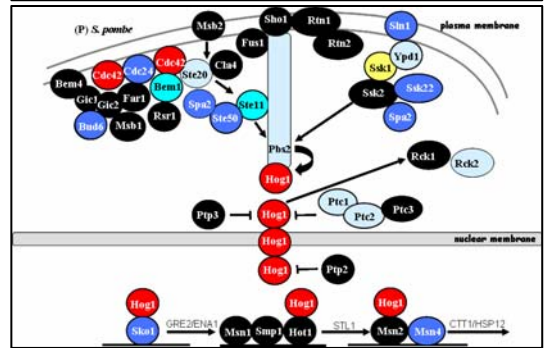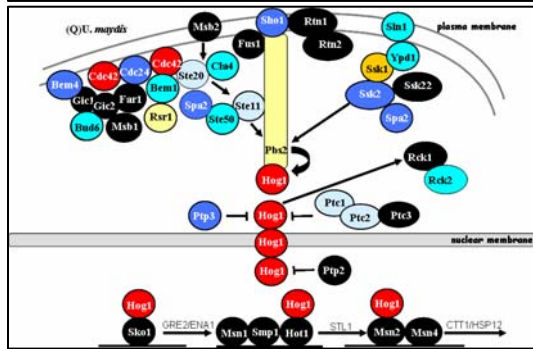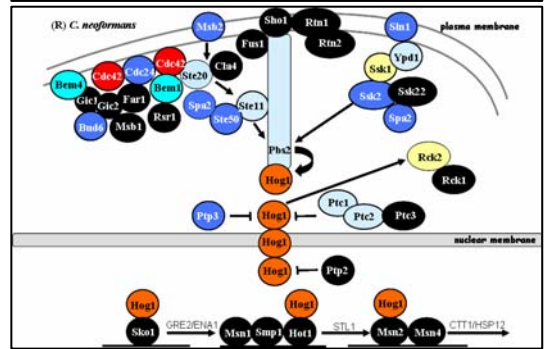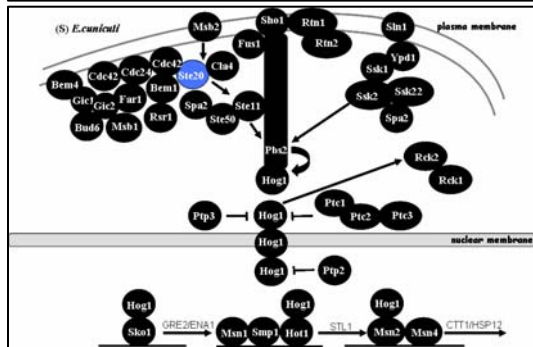



# B Oxidative stress pathway

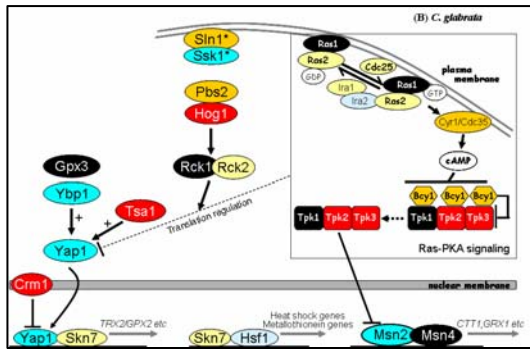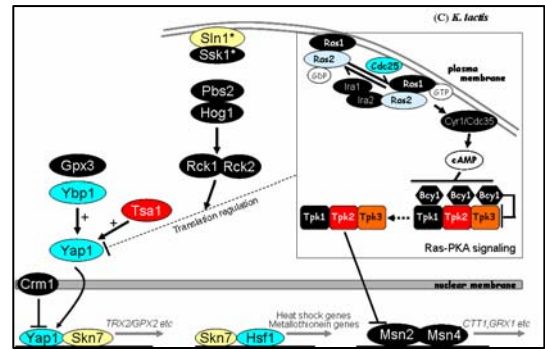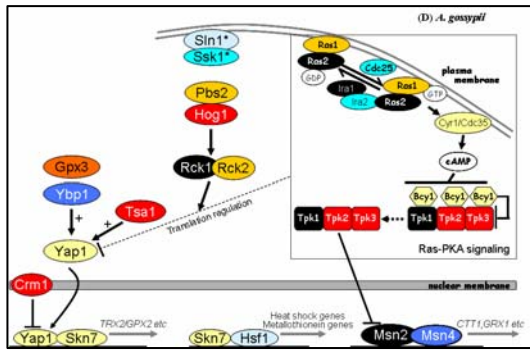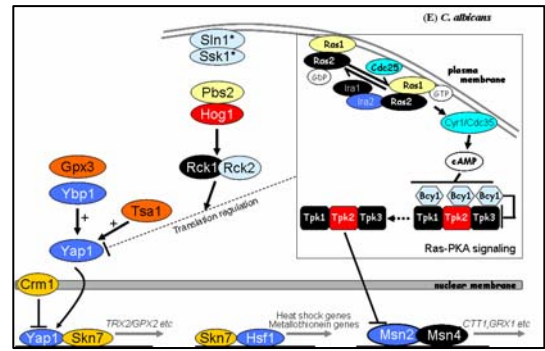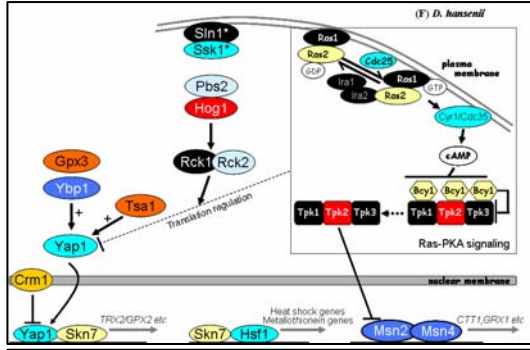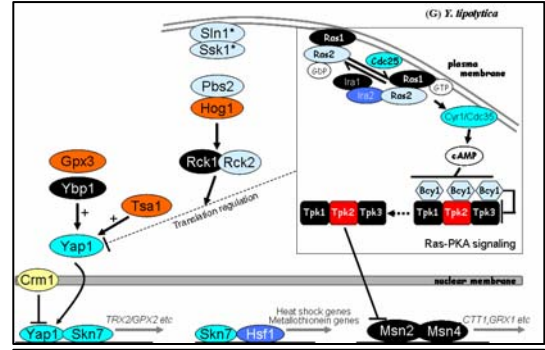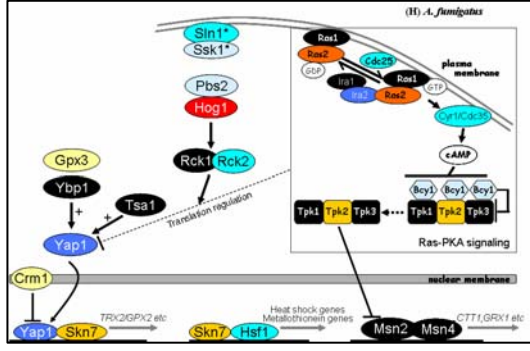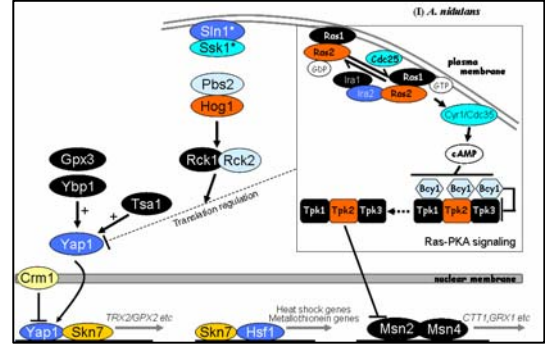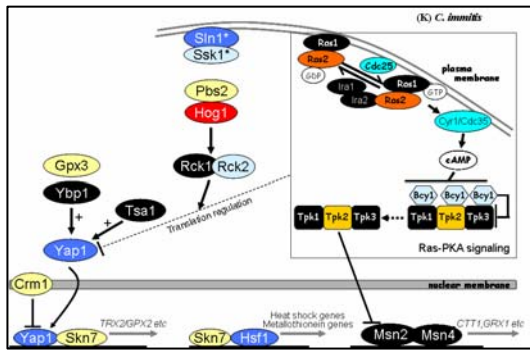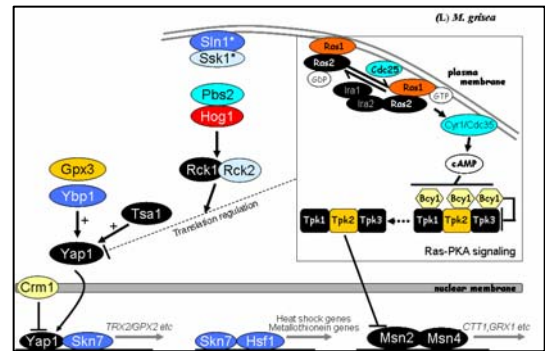

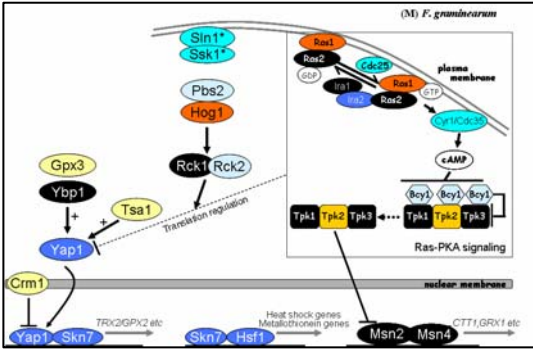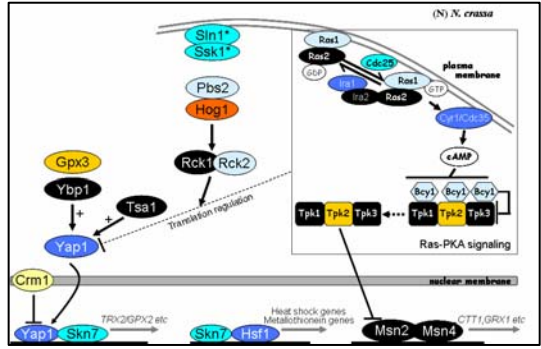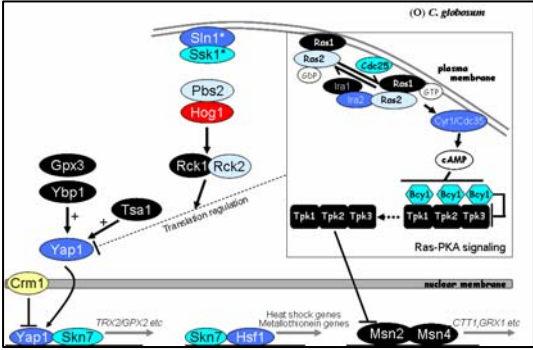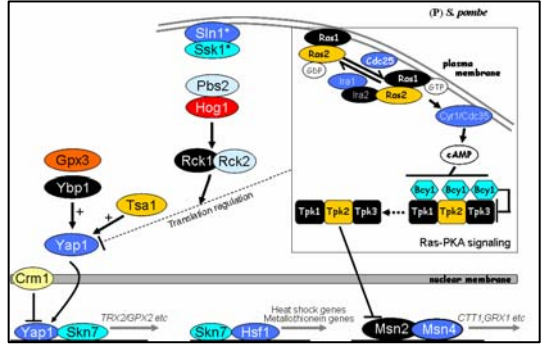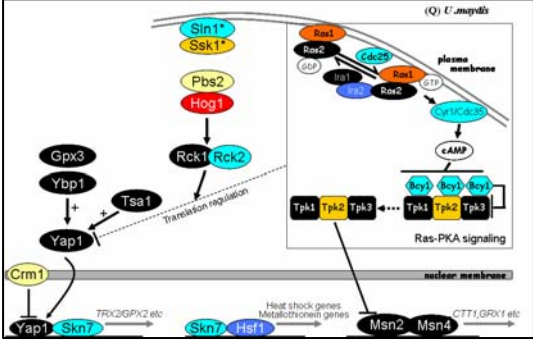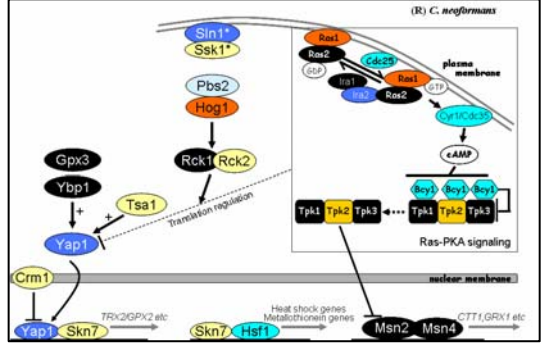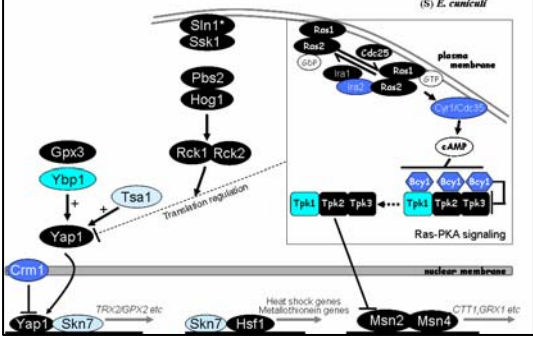

# C Cell wall stress pathway

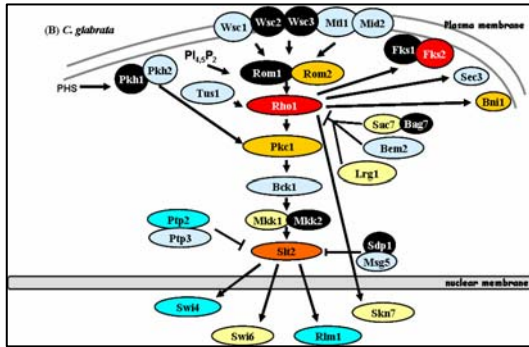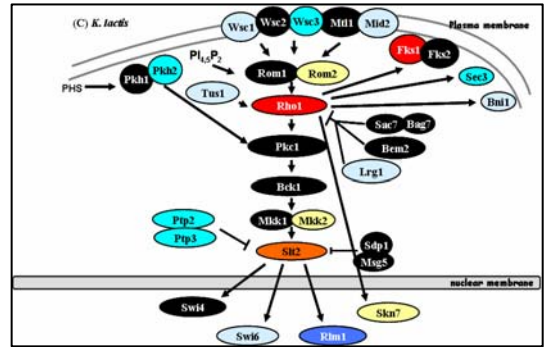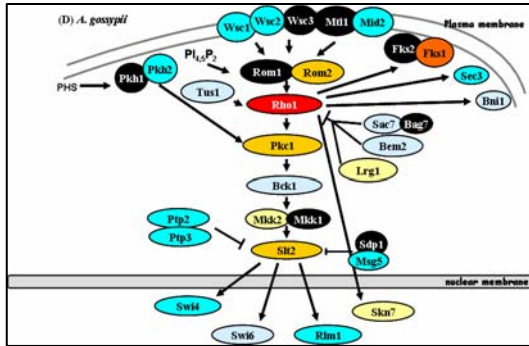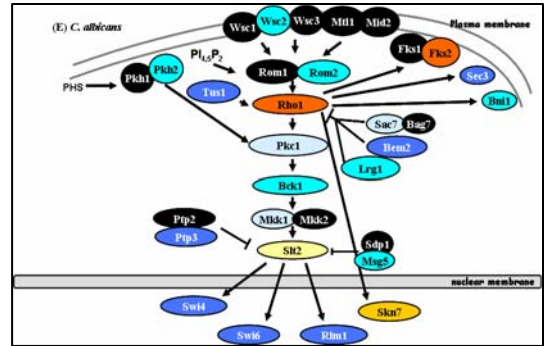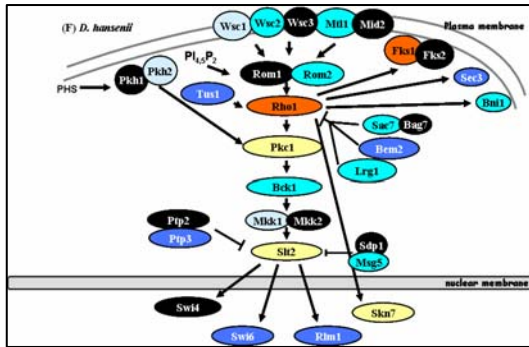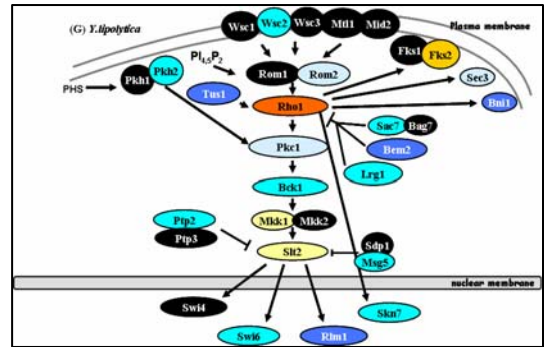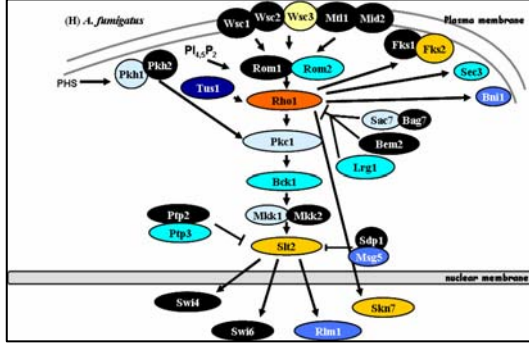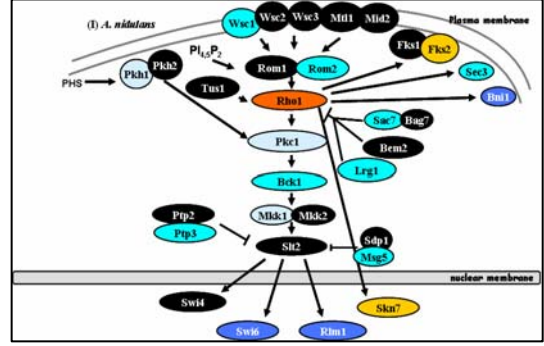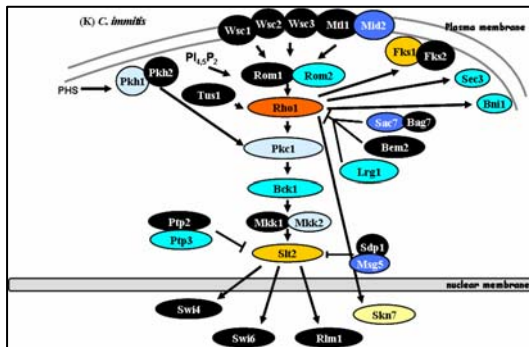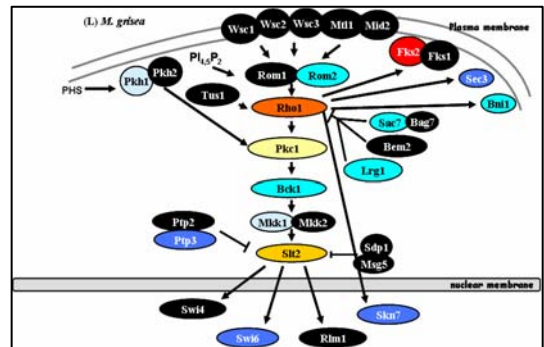



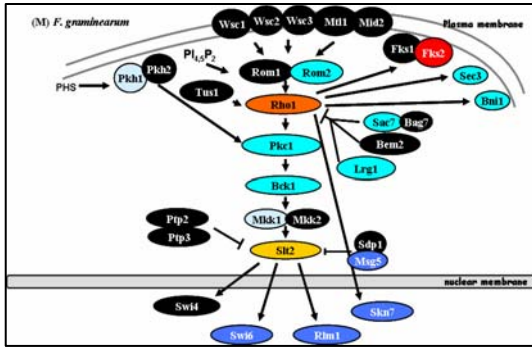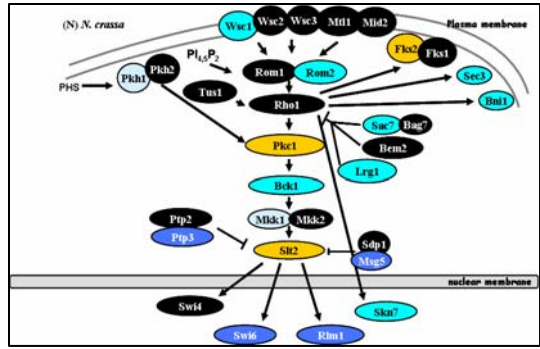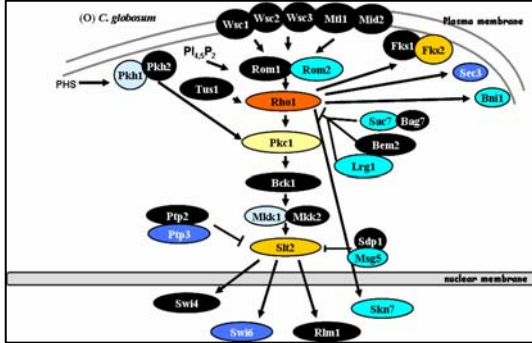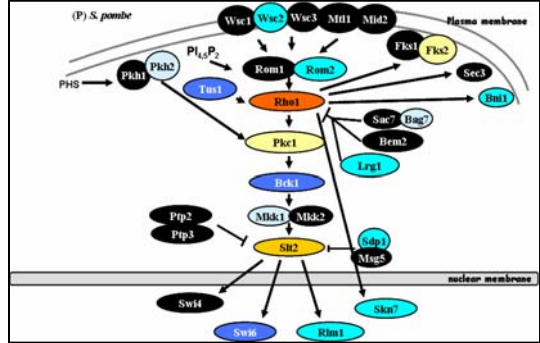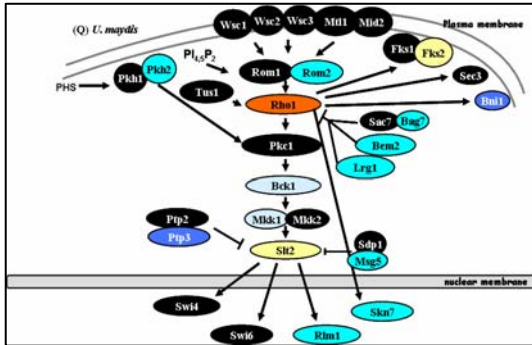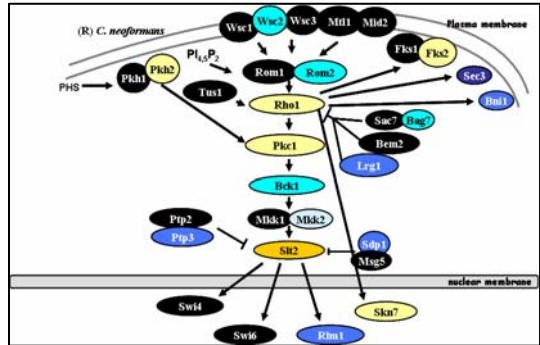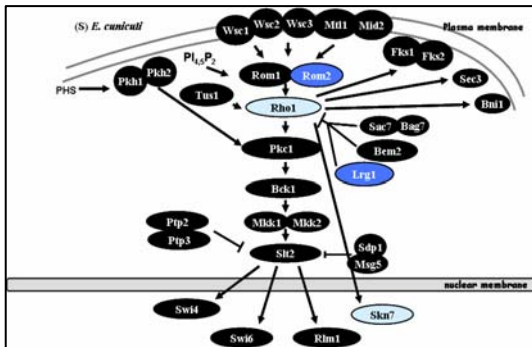

Supplement: 1471-2148-9-44-S3.pdf [file 1471-2148-9-44-S3.pdf]
