# Supplementary material for: Phylogenetic diversity of stress signalling pathways in fungi
Source: PubMed Central journal article supplement (PMC2666651; doi:10.1186/1471-2148-9-44), 2009-02-21
Supplement: 1471-2148-9-44-S1.pdf [file 1471-2148-9-44-S1.pdf]

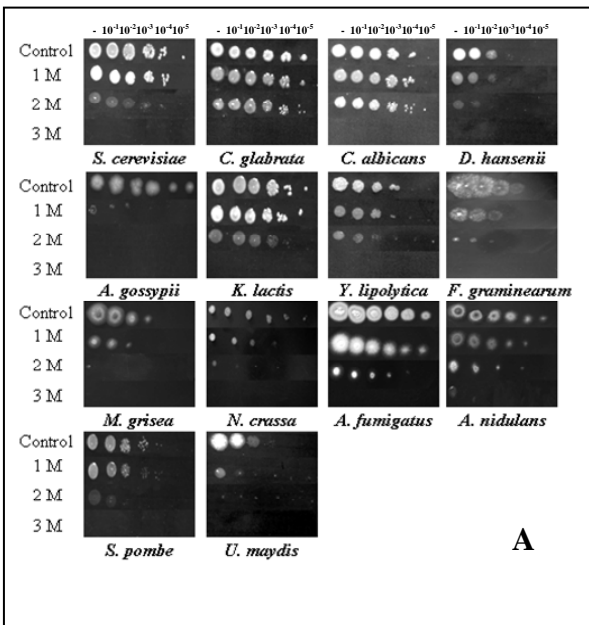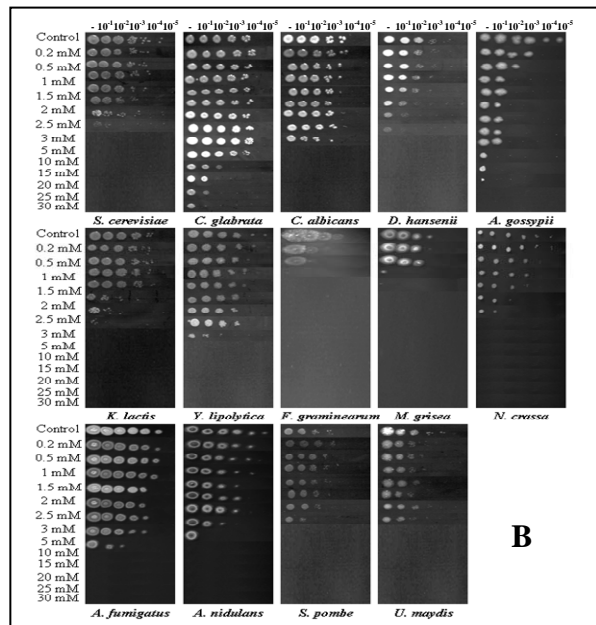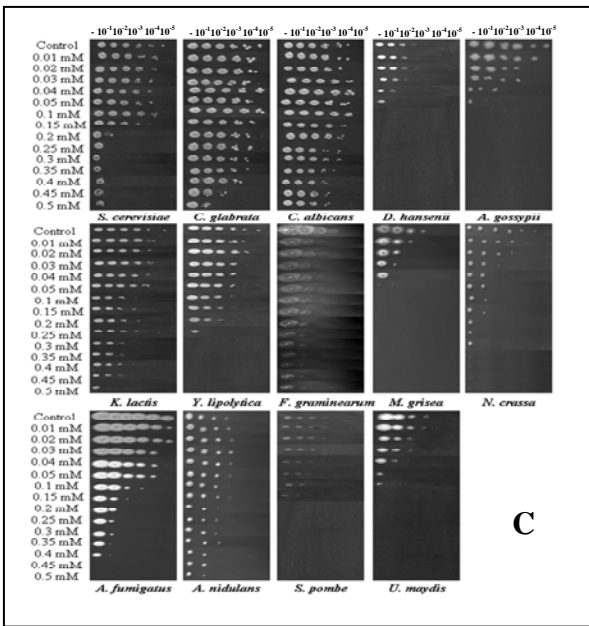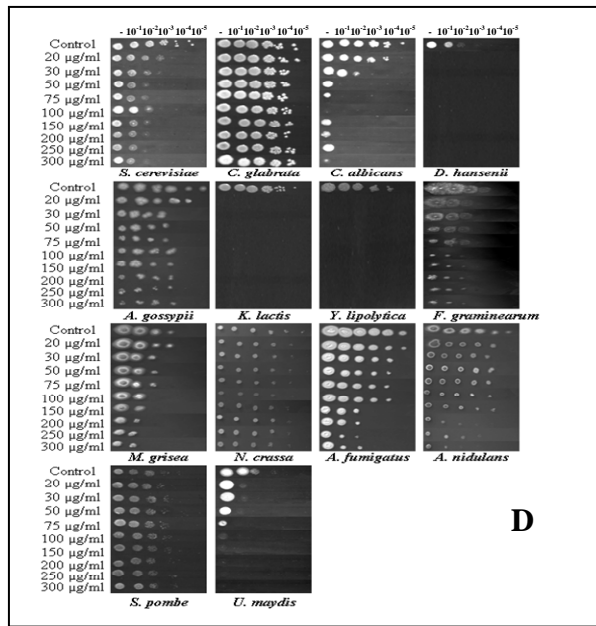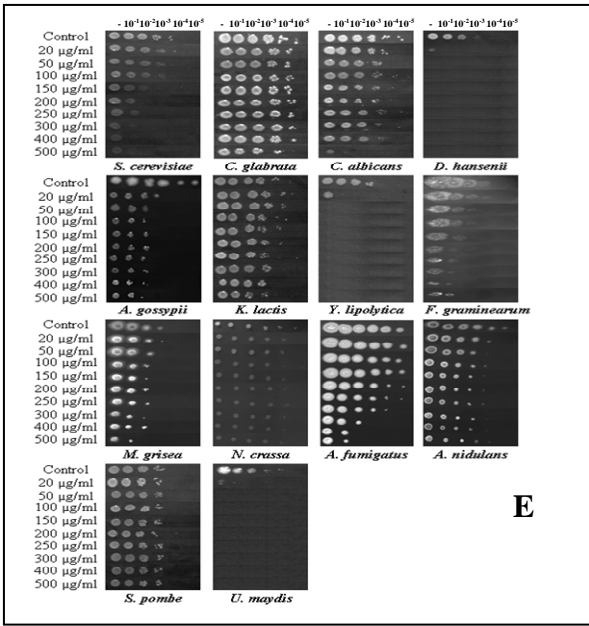

Growth of species under analysis on media plates containing (A) 1, 2 and 3 M sorbitol (B) 0.2, 0.5, 1, 1.5, 2, 2.5, 3, 5, 10, 15, 20, 25, 30 mM  $H_2O_2$  (C) 0.01, 0.2, 0.03, 0.04, 0.05, 0.1, 0.15, 0.2, 0.25, 0.3, 0.35, 0.4, 0.45, 0.5 mM menadione (D) 20, 30, 50, 75, 100, 150, 200, 250, 300  $\mu\text{g/ml}$  Calcofluor White (E) 20, 50, 100, 150, 200, 250, 300, 400, 500  $\mu\text{g/ml}$  Congo Red . Growth was also assessed on control plates lacking an inhibitor (first row of each picture).
